# Supplementary material for: Activation of two C–H bonds of NHC N-methyl groups on triosmium and triruthenium carbonyl clusters
Source: Royal Society of Chemistry journal article supplement (doi:10.1039/b718770j), 2008-01-01
Supplement: b718770j.pdf [file b718770j.pdf]

## Electronic Supporting Information

(Ms. for Dalton Transactions)

---

### **Activation of two C–H bonds of NHC N–methyl groups on triosmium and triruthenium carbonyl clusters**

*Javier A. Cabeza,\* Ignacio del Río, Daniel Miguel, Enrique Pérez-Carreño and M.  
Gabriela Sánchez-Vega*

Table SI-1. Atomic coordinates for the DFT-optimized structure of 2a

---

|    |             |             |             |
|----|-------------|-------------|-------------|
| Os | 1.37472100  | 0.00103100  | 0.84717500  |
| Os | -0.86580400 | 1.50565900  | -0.41968200 |
| Os | -1.15448000 | -1.44702400 | 0.05204000  |
| C  | 0.65802200  | 0.44478100  | 2.60433700  |
| O  | 0.28587900  | 0.65736800  | 3.67292400  |
| C  | 2.78730100  | -1.03631400 | 1.62684000  |
| O  | 3.66470700  | -1.61605700 | 2.10859800  |
| C  | 2.26601900  | 1.68653000  | 0.68941800  |
| O  | 2.82771200  | 2.69603400  | 0.61636500  |
| C  | -1.63153300 | 1.76653100  | 1.36977800  |
| O  | -2.11112100 | 1.99414700  | 2.39204700  |
| C  | -0.19006800 | 3.31378100  | -0.44635700 |
| O  | 0.18219600  | 4.40682500  | -0.48422000 |
| C  | -2.59047400 | 1.73169300  | -1.24593400 |
| O  | -3.61759300 | 1.89207000  | -1.74929100 |
| C  | -0.02241200 | 1.10896800  | -2.13417300 |
| O  | 0.43441400  | 0.96501800  | -3.18433100 |
| C  | -2.06908400 | -1.09924500 | 1.73919600  |
| O  | -2.62064100 | -0.97946300 | 2.74506900  |
| C  | -1.15489200 | -3.33716000 | 0.34798500  |
| O  | -1.17243700 | -4.48184600 | 0.50587900  |
| C  | -2.75388300 | -1.37698900 | -0.99177700 |
| O  | -3.70275000 | -1.36207200 | -1.65114700 |
| C  | 2.04775300  | -0.71118800 | -1.06273100 |
| N  | 1.36146200  | -1.52254500 | -1.90189800 |
| N  | 3.28587100  | -0.58123400 | -1.63493400 |
| C  | 2.14728700  | -1.89156200 | -2.98155600 |
| H  | 1.77096600  | -2.52919200 | -3.76497800 |
| C  | 3.35481800  | -1.30168400 | -2.81779300 |
| H  | 4.24652500  | -1.32602600 | -3.42351400 |
| C  | -0.05874400 | -1.91318300 | -1.81471000 |
| H  | -0.07036400 | -2.99214800 | -1.99706200 |
| H  | -0.54876200 | -1.46037200 | -2.68089400 |
| H  | 0.46604800  | -1.57557500 | 0.87017800  |
| C  | 4.40811500  | 0.20122300  | -1.12504700 |
| H  | 4.20946600  | 1.27191600  | -1.20148600 |
| H  | 5.28886100  | -0.03583600 | -1.72320000 |
| H  | 4.61642700  | -0.05422000 | -0.08570100 |

**Table SI-2. Atomic coordinates for the DFT-optimized structure of 3a**

---

|    |             |             |             |
|----|-------------|-------------|-------------|
| Os | -1.43873500 | -0.28850400 | -0.73487200 |
| Os | 0.60589700  | 1.58220200  | 0.18312600  |
| Os | 1.48677300  | -1.16072300 | -0.04537100 |
| C  | -0.84713600 | 0.04190400  | -2.56283700 |
| O  | -0.47275900 | 0.22217100  | -3.63755400 |
| C  | -2.64378100 | -1.72354800 | -1.20218700 |
| O  | -3.39574400 | -2.54825000 | -1.50669500 |
| C  | -2.66816600 | 1.18056000  | -0.73158800 |
| O  | -3.44022800 | 2.04199600  | -0.71778500 |
| C  | 0.48631500  | 2.68374300  | -1.43104000 |
| O  | 0.40416900  | 3.33669300  | -2.37915300 |
| C  | -0.64433000 | 2.59782000  | 1.20381600  |
| O  | -1.40499200 | 3.18050700  | 1.85259000  |
| C  | 2.17418700  | 2.43496800  | 0.89404800  |
| O  | 3.11009200  | 2.94742400  | 1.33953700  |
| C  | 2.00797600  | -1.85331400 | -1.82072200 |
| O  | 2.31351300  | -2.28542500 | -2.84187400 |
| C  | 1.31436300  | -2.84640500 | 0.85165400  |
| O  | 1.18438600  | -3.84467000 | 1.41422600  |
| C  | 3.28084200  | -0.90152800 | 0.56384500  |
| O  | 4.35513500  | -0.72680500 | 0.94246800  |
| C  | -1.67147500 | -0.58430500 | 1.35224200  |
| N  | -0.58831300 | -0.46089600 | 2.15121000  |
| N  | -2.69223300 | -0.94201200 | 2.17839500  |
| C  | -0.91128200 | -0.74643500 | 3.46549100  |
| H  | -0.18561200 | -0.69590100 | 4.26129700  |
| C  | -2.23770000 | -1.04843100 | 3.48657500  |
| H  | -2.89184600 | -1.31440800 | 4.30132700  |
| C  | 0.69839000  | -0.02146100 | 1.62471000  |
| H  | 1.35828300  | 0.09135400  | 2.48499400  |
| H  | 1.59672700  | 0.47229900  | -0.88529800 |
| H  | -0.23243100 | -1.60535300 | -0.56536100 |
| C  | -4.06456000 | -1.21284600 | 1.76478300  |
| H  | -4.37819200 | -0.47954900 | 1.02160100  |
| H  | -4.71674300 | -1.13126300 | 2.63563700  |
| H  | -4.15580600 | -2.21642100 | 1.34062600  |

**Table SI-3. Atomic coordinates for the DFT-optimized structure of 3c**

---

|    |             |             |             |
|----|-------------|-------------|-------------|
| Ru | -1.46258300 | -0.52741100 | -0.64994100 |
| Ru | 0.31051900  | 1.61368200  | 0.15681200  |
| Ru | 1.61050600  | -0.91695500 | -0.18384300 |
| C  | -1.08852600 | -0.08380900 | -2.52769700 |
| O  | -0.84080900 | 0.14889100  | -3.62525500 |
| C  | -2.48425800 | -2.15346100 | -1.02938100 |
| O  | -3.12977200 | -3.07905800 | -1.25092200 |
| C  | -2.91004400 | 0.73636700  | -0.49646200 |
| O  | -3.81134700 | 1.44860300  | -0.40427900 |
| C  | -0.09872600 | 2.71406400  | -1.44180900 |
| O  | -0.33930300 | 3.35870100  | -2.36322900 |
| C  | -1.00208100 | 2.40103300  | 1.31504800  |
| O  | -1.76466100 | 2.85603600  | 2.05127000  |
| C  | 1.78131000  | 2.70356000  | 0.76987600  |
| O  | 2.65366600  | 3.34863200  | 1.15813900  |
| C  | 2.12712300  | -1.50386100 | -2.02967900 |
| O  | 2.41063100  | -1.86079000 | -3.08125000 |
| C  | 1.76324200  | -2.61875500 | 0.71573200  |
| O  | 1.81206900  | -3.62434400 | 1.27106600  |
| C  | 3.37575700  | -0.33810200 | 0.32036000  |
| O  | 4.42092500  | 0.02601400  | 0.62880200  |
| C  | -1.47058800 | -0.88440500 | 1.39726600  |
| N  | -0.39200100 | -0.60391500 | 2.13441300  |
| O  | -2.37674200 | -1.45690900 | 2.21379500  |
| C  | -0.60417400 | -1.00683400 | 3.45445100  |
| H  | 0.13434900  | -0.87580300 | 4.22863900  |
| C  | -1.84486300 | -1.53107400 | 3.48420800  |
| H  | -2.46376300 | -1.96028700 | 4.25384500  |
| C  | 0.76463100  | 0.05463100  | 1.54001600  |
| H  | 1.45253000  | 0.26145100  | 2.36096100  |
| H  | 1.33825800  | 0.66740100  | -0.99989100 |
| H  | -0.01887300 | -1.57759900 | -0.61433000 |
